# Supplementary material for: Blood RNA Signatures Enable Accurate Discrimination of Stroke Subtype and Onset Time at Hospital Admission
Source: Research Square preprint supplement (doi:10.21203/rs.3.rs-9022364/v1), 2026-03-08
Supplement: Supplementary file 1 [file 6ede0f53fec28a007b7a950d.docx]

**Supplementary Data**

1. **Selection of Representative Biomarker Panels**

**Method**: When multiple multi-transcript panels achieved equivalent classification performance, a representative panel was selected using a predefined hierarchical procedure. First, transcript recurrence was assessed across all panels achieving perfect or near-perfect accuracy, and panels composed of transcripts with the highest recurrence were prioritized, reflecting stable and reproducible biological signals. Second, panels were favored if their constituent transcripts appeared consistently in high-performing models across multiple classification tasks, supporting cross-task generalizability. Third, practical assay considerations were applied, prioritizing transcripts with higher expression levels, lower variance, and established annotation (e.g., RefSeq or Ensembl identifiers). Finally, when panels remained equivalent after applying these criteria, a single representative panel was selected deterministically (lexicographic order) to ensure transparent and reproducible reporting.

**2.1. Suppl. Table 1. Complete lists of performance-equivalent panels**

| **Panel ID** | **Panel** |
| --- | --- |
| **Task 1.1: Hemorrhagic Stroke Diagnosis** | |
| 1 | ENST00000587014, MSTRG_24342_56, MSTRG_42624_2 |
| 2 | ENST00000587014, MSTRG_32734_241, MSTRG_50567_5 |
| 3 | ENST00000587014, MSTRG_32734_241, ENST00000465590, MSTRG_50567_5 |
| 4 | ENST00000487938, ENST00000587014, ENST00000465590, MSTRG_42624_2 |
| **Task 1.2: Ischemic Stroke Diagnosis** | |
| 1 | MSTRG_7936_41, MSTRG_10294_21, ENST00000397762, ENST00000418132 |
| 2 | MSTRG_7936_41, MSTRG_10294_21, ENST00000366610, MSTRG_33000_70 |
| 3 | MSTRG_7936_41, ENST00000334478, ENST00000366610, MSTRG_30322_1 |
| 4 | MSTRG_10998_6, ENST00000397762, MSTRG_29622_3, MSTRG_30322_1 |
| 5 | MSTRG_11605_17, ENST00000418132, MSTRG_34751_3, MSTRG_43616_8 |
| 6 | MSTRG_13088_1, MSTRG_31553_5, MSTRG_33000_70, MSTRG_33000_147 |
| 7 | ENST00000397762, MSTRG_33000_70, MSTRG_29622_3, MSTRG_34751_3 |
| **Task 2:** **Prediction of actionable time of stroke onset** | |
| 1 | ENST00000677363, ENST00000531913, MSTRG_11018_26, MSTRG_25098_5 |
| 2 | ENST00000677363, MSTRG_11018_26, MSTRG_5155_11, MSTRG_54881_4 |
| 3 | ENST00000677363, MSTRG_14566_3, MSTRG_19969_3, MSTRG_25098_5 |
| 4 | ENST00000677363, MSTRG_18702_9, MSTRG_25098_5, ENST00000497184 |
| 5 | ENST00000677363, MSTRG_19969_3, MSTRG_20625_14, ENST00000497184 |
| 6 | ENST00000677363, MSTRG_20625_14, ENST00000497184, MSTRG_48005_8 |
| 7 | MSTRG_7273_18, ENST00000531913, MSTRG_11018_26, MSTRG_19969_3 |
| 8 | MSTRG_7273_18, ENST00000531913, ENST00000376096, MSTRG_54881_4 |
| 9 | ENST00000531913, MSTRG_10525_36, MSTRG_11018_26, MSTRG_19969_3 |
| 10 | ENST00000531913, MSTRG_10525_36, MSTRG_11018_26, MSTRG_25098_5 |
| 11 | ENST00000531913, MSTRG_10525_36, MSTRG_19969_3, MSTRG_22173_12 |
| 12 | ENST00000531913, MSTRG_10525_36, MSTRG_19969_3, ENST00000484880 |
| 13 | ENST00000531913, MSTRG_10525_36, MSTRG_19969_3, ENST00000396334 |
| 14 | ENST00000531913, MSTRG_10525_36, MSTRG_19969_3, ENST00000506047 |
| 15 | ENST00000531913, MSTRG_10525_36, MSTRG_20625_14, ENST00000492439 |
| 16 | ENST00000531913, MSTRG_10525_36, MSTRG_20625_14, ENST00000506047 |
| 17 | ENST00000531913, MSTRG_10525_36, ENST00000441391, MSTRG_25098_5 |
| 18 | ENST00000531913, MSTRG_10525_36, ENST00000484880, ENST00000372390 |
| 19 | ENST00000531913, MSTRG_11018_26, MSTRG_14566_3, ENST00000396334 |
| 20 | ENST00000531913, MSTRG_11018_26, MSTRG_19969_3, MSTRG_20625_14 |
| 21 | ENST00000531913, MSTRG_11018_26, MSTRG_19969_3, ENST00000483414 |
| 22 | ENST00000531913, MSTRG_11018_26, MSTRG_19969_3, MSTRG_48392_40 |
| 23 | ENST00000531913, MSTRG_11018_26, MSTRG_19969_3, MSTRG_54881_4 |
| 24 | ENST00000531913, MSTRG_11018_26, MSTRG_34017_3, ENST00000396334 |
| 25 | ENST00000531913, MSTRG_11018_26, ENST00000396334, ENST00000506047 |
| 26 | ENST00000531913, MSTRG_14566_3, MSTRG_19969_3, MSTRG_54881_4 |
| 27 | ENST00000531913, MSTRG_14566_3, MSTRG_25098_5, MSTRG_48392_40 |
| 28 | ENST00000531913, MSTRG_14566_3, ENST00000492439, ENST00000396334 |
| 29 | ENST00000531913, MSTRG_19969_3, MSTRG_20625_14, MSTRG_25098_5 |
| 30 | ENST00000531913, MSTRG_19969_3, MSTRG_20625_14, MSTRG_48005_8 |
| 31 | ENST00000531913, MSTRG_19969_3, MSTRG_20625_14, MSTRG_54881_4 |
| 32 | ENST00000531913, MSTRG_19969_3, ENST00000441391, MSTRG_25098_5 |
| 33 | ENST00000531913, MSTRG_19969_3, MSTRG_25098_5, MSTRG_5155_11 |
| 34 | ENST00000531913, MSTRG_19969_3, MSTRG_25098_5, ENST00000506047 |
| 35 | ENST00000531913, MSTRG_19969_3, ENST00000484880, MSTRG_48005_8 |
| 36 | ENST00000531913, MSTRG_19969_3, MSTRG_3327_3, ENST00000506047 |
| 37 | ENST00000531913, MSTRG_19969_3, MSTRG_5155_11, MSTRG_54881_4 |
| 38 | ENST00000531913, MSTRG_19969_3, MSTRG_34017_3, MSTRG_48005_8 |
| 39 | ENST00000531913, MSTRG_19969_3, ENST00000492439, ENST00000396334 |
| 40 | ENST00000531913, MSTRG_19969_3, ENST00000506047, ENST00000642763 |
| 41 | ENST00000531913, MSTRG_19969_3, ENST00000506047, MSTRG_54881_4 |
| 42 | ENST00000531913, MSTRG_19969_3, ENST00000376096, ENST00000497184 |
| 43 | ENST00000531913, MSTRG_19969_3, ENST00000497184, ENST00000483414 |
| 44 | ENST00000531913, MSTRG_19969_3, ENST00000483414, MSTRG_48392_40 |
| 45 | ENST00000531913, MSTRG_19969_3, MSTRG_48005_8, MSTRG_48392_40 |
| 46 | ENST00000531913, MSTRG_19969_3, ENST00000642763, MSTRG_54881_4 |
| 47 | ENST00000531913, MSTRG_22173_12, MSTRG_25098_5, MSTRG_5155_11 |
| 48 | ENST00000531913, MSTRG_25098_5, ENST00000484880, ENST00000396334 |
| 49 | ENST00000531913, MSTRG_25098_5, ENST00000484880, ENST00000506047 |
| 50 | ENST00000531913, MSTRG_25098_5, ENST00000376096, ENST00000642763 |
| 51 | ENST00000531913, ENST00000484880, MSTRG_5155_11, ENST00000396334 |
| 52 | ENST00000531913, ENST00000484880, ENST00000376096, MSTRG_54881_4 |
| 53 | ENST00000531913, MSTRG_5155_11, MSTRG_48005_8, ENST00000372390 |
| 54 | ENST00000531913, ENST00000492439, ENST00000396334, MSTRG_54881_4 |
| 55 | ENST00000531913, ENST00000492439, MSTRG_48005_8, MSTRG_54881_4 |
| 56 | ENST00000531913, ENST00000492439, ENST00000642763, MSTRG_54881_4 |
| 57 | ENST00000531913, ENST00000396334, MSTRG_48005_8, ENST00000372390 |
| 58 | ENST00000531913, ENST00000506047, ENST00000483414, ENST00000372390 |
| 59 | ENST00000531913, ENST00000376096, ENST00000483414, ENST00000372390 |
| 60 | ENST00000531913, ENST00000376096, ENST00000642763, ENST00000372390 |
| 61 | ENST00000531913, ENST00000376096, ENST00000642763, MSTRG_54881_4 |
| 62 | MSTRG_10525_36, MSTRG_20625_14, ENST00000396334, ENST00000642763 |
| 63 | MSTRG_11018_26, MSTRG_34017_3, MSTRG_39141_7, MSTRG_54881_4 |
| 64 | ENST00000551258, ENST00000484880, MSTRG_5155_11, ENST00000497184 |
| 65 | MSTRG_14566_3, MSTRG_22173_12, MSTRG_25098_5, MSTRG_5155_11 |
| 66 | MSTRG_14566_3, ENST00000441391, MSTRG_5155_11, ENST00000396334 |
| 67 | MSTRG_14566_3, MSTRG_25098_5, ENST00000642763, MSTRG_54881_4 |
| 68 | MSTRG_14566_3, MSTRG_25098_5, ENST00000372390, MSTRG_54816_3 |
| 69 | MSTRG_14566_3, ENST00000484880, MSTRG_5155_11, ENST00000396334 |
| 70 | MSTRG_14566_3, ENST00000396334, MSTRG_48005_8, MSTRG_54881_4 |
| 71 | MSTRG_19969_3, MSTRG_20625_14, ENST00000642763, MSTRG_54881_4 |
| 72 | MSTRG_20625_14, MSTRG_25098_5, ENST00000396334, MSTRG_54881_4 |
| 73 | MSTRG_20625_14, ENST00000497184, ENST00000642763, ENST00000372390 |
| 74 | ENST00000396334, ENST00000497184, ENST00000642763, MSTRG_54816_3 |
| **Task 3: Prediction of NIHSS stroke severity rating** | |
| 1 | MSTRG_6960_4, MSTRG_7963_25, ENST00000238721, ENST00000296088 |
| 2 | MSTRG_6960_4, MSTRG_10895_4, MSTRG_22220_1, MSTRG_30661_17 |
| 3 | MSTRG_6960_4, MSTRG_10895_4, MSTRG_3287_5, ENST00000694921 |
| 4 | MSTRG_6960_4, MSTRG_18204_6, MSTRG_28891_22, ENST00000305097 |
| 5 | MSTRG_6960_4, MSTRG_3287_5, ENST00000694921, ENST00000450273 |
| 6 | MSTRG_7963_25, MSTRG_10613_1, MSTRG_10895_4, ENST00000238721 |
| 7 | MSTRG_7963_25, MSTRG_11929_9, MSTRG_575_23, MSTRG_1153_17 |
| 8 | MSTRG_7963_25, MSTRG_18204_6, MSTRG_28891_22, ENST00000305097 |
| 9 | MSTRG_7963_25, MSTRG_26337_1, ENST00000450273, ENST00000305097 |
| 10 | MSTRG_7963_25, ENST00000480825, MSTRG_3287_5, ENST00000694921 |
| 11 | MSTRG_7963_25, MSTRG_30661_17, MSTRG_30665_6, ENST00000357266 |
| 12 | MSTRG_10611_5, MSTRG_10613_1, MSTRG_10895_4, ENST00000238721 |
| 13 | MSTRG_10611_5, MSTRG_11929_9, ENST00000587709, ENST00000694921 |
| 14 | MSTRG_10611_5, MSTRG_18204_6, MSTRG_22220_1, ENST00000587709 |
| 15 | MSTRG_10611_5, MSTRG_1097_9, MSTRG_28891_22, MSTRG_30661_17 |
| 16 | MSTRG_10613_1, MSTRG_10895_4, ENST00000238721, MSTRG_28891_22 |
| 17 | MSTRG_10613_1, ENST00000587709, ENST00000480825, MSTRG_28891_22 |
| 18 | MSTRG_10613_1, ENST00000587709, MSTRG_28891_22, ENST00000305097 |
| 19 | MSTRG_10613_1, MSTRG_26337_1, MSTRG_3287_5, ENST00000694921 |
| 20 | MSTRG_10613_1, ENST00000694921, ENST00000489175, ENST00000296088 |
| 21 | MSTRG_10895_4, MSTRG_11929_9, ENST00000587709, ENST00000694921 |
| 22 | MSTRG_10895_4, MSTRG_18204_6, MSTRG_28891_22, MSTRG_30661_17 |
| 23 | MSTRG_10895_4, MSTRG_22220_1, ENST00000238721, MSTRG_28891_22 |
| 24 | MSTRG_10895_4, MSTRG_26337_1, ENST00000694921, ENST00000232014 |
| 25 | MSTRG_10895_4, MSTRG_26337_1, ENST00000489175, ENST00000232014 |
| 26 | MSTRG_10895_4, MSTRG_26337_1, MSTRG_28891_22, ENST00000305097 |
| 27 | MSTRG_10895_4, MSTRG_1097_9, MSTRG_1153_17, ENST00000238721 |
| 28 | MSTRG_10895_4, ENST00000480825, ENST00000238721, ENST00000305097 |
| 29 | MSTRG_11929_9, MSTRG_18204_6, ENST00000489175, ENST00000238721 |
| 30 | MSTRG_11929_9, MSTRG_22220_1, MSTRG_575_23, MSTRG_30661_17 |
| 31 | MSTRG_11929_9, ENST00000587709, MSTRG_3287_5, ENST00000694921 |
| 32 | MSTRG_11929_9, ENST00000587709, MSTRG_28891_22, MSTRG_42624_1 |
| 33 | MSTRG_11929_9, MSTRG_3287_5, ENST00000296088, MSTRG_42624_1 |
| 34 | MSTRG_11929_9, ENST00000694921, ENST00000489175, MSTRG_28891_22 |
| 35 | MSTRG_11929_9, ENST00000238721, MSTRG_42624_1, ENST00000357266 |
| 36 | MSTRG_18204_6, ENST00000489175, ENST00000232014, ENST00000357266 |
| 37 | MSTRG_22220_1, ENST00000587709, ENST00000480825, ENST00000450273 |
| 38 | MSTRG_22220_1, ENST00000008938, MSTRG_3287_5, ENST00000357266 |
| 39 | ENST00000587709, ENST00000008938, ENST00000480825, MSTRG_30665_6 |
| 40 | ENST00000587709, ENST00000480825, MSTRG_3287_5, MSTRG_28891_22 |
| 41 | MSTRG_575_23, MSTRG_1097_9, ENST00000450273, MSTRG_30665_6 |
| 42 | MSTRG_1097_9, MSTRG_28891_22, ENST00000296088, ENST00000305097 |
| 43 | MSTRG_1153_17, ENST00000694921, MSTRG_30661_17, ENST00000357266 |

- 1. **Suppl. Table 2:** Recurrence and characteristics of transcripts across performance-equivalent biomarker panels. The table summarizes the frequency with which each transcript appears in panels achieving perfect or near-perfect classification accuracy, its presence across multiple classification tasks, and expression characteristics relevant to assay feasibility. These metrics were used as predefined criteria to guide representative panel selection when multiple panels satisfied all performance thresholds.

| **Panel** | **Occurrence** |
| --- | --- |
| **Task 1.2: Ischemic Stroke vs. Stroke Mimic** | |
| ENST00000587014, MSTRG_24342_56, MSTRG_42624_2 | NA |
| ENST00000587014, MSTRG_32734_241, MSTRG_50567_5 | NA |
| ENST00000587014, MSTRG_32734_241, ENST00000465590, MSTRG_50567_5 | NA |
| ENST00000487938, ENST00000587014, ENST00000465590, MSTRG_42624_2 | NA |
| **Task 1.2: Ischemic Stroke vs. Stroke Mimic** | |
| MSTRG_7936_41, MSTRG_10294_21, ENST00000397762, ENST00000418132 | 10 |
| MSTRG_7936_41, MSTRG_10294_21, ENST00000366610, MSTRG_33000_70 | 10 |
| MSTRG_7936_41, ENST00000334478, ENST00000366610, MSTRG_30322_1 | 08 |
| MSTRG_10998_6, ENST00000397762, MSTRG_29622_3, MSTRG_30322_1 | 08 |
| MSTRG_11605_17, ENST00000418132, MSTRG_34751_3, MSTRG_43616_8 | 06 |
| MSTRG_13088_1, MSTRG_31553_5, MSTRG_33000_70, MSTRG_33000_147 | 06 |
| ENST00000397762, MSTRG_33000_70, MSTRG_29622_3, MSTRG_34751_3 | 10 |
| **Task 2: Prediction of Actionable Time of Stroke Onset** | |
| ENST00000677363, ENST00000531913, MSTRG_11018_26, MSTRG_25098_5 | 92 |
| ENST00000677363, MSTRG_11018_26, MSTRG_5155_11, MSTRG_54881_4 | 47 |
| ENST00000677363, MSTRG_14566_3, MSTRG_19969_3, MSTRG_25098_5 | 67 |
| ENST00000677363, MSTRG_18702_9, MSTRG_25098_5, ENST00000497184 | 33 |
| ENST00000677363, MSTRG_19969_3, MSTRG_20625_14, ENST00000497184 | 58 |
| ENST00000677363, MSTRG_20625_14, ENST00000497184, MSTRG_48005_8 | 35 |
| MSTRG_7273_18, ENST00000531913, MSTRG_11018_26, MSTRG_19969_3 | 103 |
| MSTRG_7273_18, ENST00000531913, ENST00000376096, MSTRG_54881_4 | 83 |
| ENST00000531913, MSTRG_10525_36, MSTRG_11018_26, MSTRG_19969_3 | 112 |
| ENST00000531913, MSTRG_10525_36, MSTRG_11018_26, MSTRG_25098_5 | 98 |
| ENST00000531913, MSTRG_10525_36, MSTRG_19969_3, MSTRG_22173_12 | 102 |
| ENST00000531913, MSTRG_10525_36, MSTRG_19969_3, ENST00000484880 | 108 |
| ENST00000531913, MSTRG_10525_36, MSTRG_19969_3, ENST00000396334 | 115 |
| ENST00000531913, MSTRG_10525_36, MSTRG_19969_3, ENST00000506047 | 108 |
| ENST00000531913, MSTRG_10525_36, MSTRG_20625_14, ENST00000492439 | 85 |
| ENST00000531913, MSTRG_10525_36, MSTRG_20625_14, ENST00000506047 | 88 |
| ENST00000531913, MSTRG_10525_36, ENST00000441391, MSTRG_25098_5 | 88 |
| ENST00000531913, MSTRG_10525_36, ENST00000484880, ENST00000372390 | 84 |
| ENST00000531913, MSTRG_11018_26, MSTRG_14566_3, ENST00000396334 | 96 |
| ENST00000531913, MSTRG_11018_26, MSTRG_19969_3, MSTRG_20625_14 | 113 |
| ENST00000531913, MSTRG_11018_26, MSTRG_19969_3, ENST00000483414 | 106 |
| ENST00000531913, MSTRG_11018_26, MSTRG_19969_3, MSTRG_48392_40 | 105 |
| ENST00000531913, MSTRG_11018_26, MSTRG_19969_3, MSTRG_54881_4 | 119 |
| ENST00000531913, MSTRG_11018_26, MSTRG_34017_3, ENST00000396334 | 88 |
| ENST00000531913, MSTRG_11018_26, ENST00000396334, ENST00000506047 | 94 |
| ENST00000531913, MSTRG_14566_3, MSTRG_19969_3, MSTRG_54881_4 | 117 |
| ENST00000531913, MSTRG_14566_3, MSTRG_25098_5, MSTRG_48392_40 | 89 |
| ENST00000531913, MSTRG_14566_3, ENST00000492439, ENST00000396334 | 89 |
| ENST00000531913, MSTRG_19969_3, MSTRG_20625_14, MSTRG_25098_5 | 118 |
| ENST00000531913, MSTRG_19969_3, MSTRG_20625_14, MSTRG_48005_8 | 109 |
| ENST00000531913, MSTRG_19969_3, MSTRG_20625_14, MSTRG_54881_4 | 118 |
| ENST00000531913, MSTRG_19969_3, ENST00000441391, MSTRG_25098_5 | 109 |
| ENST00000531913, MSTRG_19969_3, MSTRG_25098_5, MSTRG_5155_11 | 116 |
| ENST00000531913, MSTRG_19969_3, MSTRG_25098_5, ENST00000506047 | 115 |
| ENST00000531913, MSTRG_19969_3, ENST00000484880, MSTRG_48005_8 | 106 |
| ENST00000531913, MSTRG_19969_3, MSTRG_3327_3, ENST00000506047 | 98 |
| ENST00000531913, MSTRG_19969_3, MSTRG_5155_11, MSTRG_54881_4 | 116 |
| ENST00000531913, MSTRG_19969_3, MSTRG_34017_3, MSTRG_48005_8 | 100 |
| ENST00000531913, MSTRG_19969_3, ENST00000492439, ENST00000396334 | 110 |
| ENST00000531913, MSTRG_19969_3, ENST00000506047, ENST00000642763 | 108 |
| ENST00000531913, MSTRG_19969_3, ENST00000506047, MSTRG_54881_4 | 115 |
| ENST00000531913, MSTRG_19969_3, ENST00000376096, ENST00000497184 | 103 |
| ENST00000531913, MSTRG_19969_3, ENST00000497184, ENST00000483414 | 101 |
| ENST00000531913, MSTRG_19969_3, ENST00000483414, MSTRG_48392_40 | 97 |
| ENST00000531913, MSTRG_19969_3, MSTRG_48005_8, MSTRG_48392_40 | 101 |
| ENST00000531913, MSTRG_19969_3, ENST00000642763, MSTRG_54881_4 | 117 |
| ENST00000531913, MSTRG_22173_12, MSTRG_25098_5, MSTRG_5155_11 | 87 |
| ENST00000531913, MSTRG_25098_5, ENST00000484880, ENST00000396334 | 99 |
| ENST00000531913, MSTRG_25098_5, ENST00000484880, ENST00000506047 | 92 |
| ENST00000531913, MSTRG_25098_5, ENST00000376096, ENST00000642763 | 92 |
| ENST00000531913, ENST00000484880, MSTRG_5155_11, ENST00000396334 | 91 |
| ENST00000531913, ENST00000484880, ENST00000376096, MSTRG_54881_4 | 90 |
| ENST00000531913, MSTRG_5155_11, MSTRG_48005_8, ENST00000372390 | 83 |
| ENST00000531913, ENST00000492439, ENST00000396334, MSTRG_54881_4 | 96 |
| ENST00000531913, ENST00000492439, MSTRG_48005_8, MSTRG_54881_4 | 89 |
| ENST00000531913, ENST00000492439, ENST00000642763, MSTRG_54881_4 | 91 |
| ENST00000531913, ENST00000396334, MSTRG_48005_8, ENST00000372390 | 89 |
| ENST00000531913, ENST00000506047, ENST00000483414, ENST00000372390 | 78 |
| ENST00000531913, ENST00000376096, ENST00000483414, ENST00000372390 | 76 |
| ENST00000531913, ENST00000376096, ENST00000642763, ENST00000372390 | 82 |
| ENST00000531913, ENST00000376096, ENST00000642763, MSTRG_54881_4 | 92 |
| MSTRG_10525_36, MSTRG_20625_14, ENST00000396334, ENST00000642763 | 50 |
| MSTRG_11018_26, MSTRG_34017_3, MSTRG_39141_7, MSTRG_54881_4 | 35 |
| ENST00000551258, ENST00000484880, MSTRG_5155_11, ENST00000497184 | 28 |
| MSTRG_14566_3, MSTRG_22173_12, MSTRG_25098_5, MSTRG_5155_11 | 42 |
| MSTRG_14566_3, ENST00000441391, MSTRG_5155_11, ENST00000396334 | 40 |
| MSTRG_14566_3, MSTRG_25098_5, ENST00000642763, MSTRG_54881_4 | 58 |
| MSTRG_14566_3, MSTRG_25098_5, ENST00000372390, MSTRG_54816_3 | 39 |
| MSTRG_14566_3, ENST00000484880, MSTRG_5155_11, ENST00000396334 | 46 |
| MSTRG_14566_3, ENST00000396334, MSTRG_48005_8, MSTRG_54881_4 | 54 |
| MSTRG_19969_3, MSTRG_20625_14, ENST00000642763, MSTRG_54881_4 | 73 |
| MSTRG_20625_14, MSTRG_25098_5, ENST00000396334, MSTRG_54881_4 | 64 |
| MSTRG_20625_14, ENST00000497184, ENST00000642763, ENST00000372390 | 39 |
| ENST00000396334, ENST00000497184, ENST00000642763, MSTRG_54816_3 | 37 |
| **Task 3:** **Prediction of NIHSS stroke severity rating** | |
| MSTRG_6960_4, MSTRG_7963_25, ENST00000238721, ENST00000296088 | 25 |
| MSTRG_6960_4, MSTRG_10895_4, MSTRG_22220_1, MSTRG_30661_17 | 30 |
| MSTRG_6960_4, MSTRG_10895_4, MSTRG_3287_5, ENST00000694921 | 37 |
| MSTRG_6960_4, MSTRG_18204_6, MSTRG_28891_22, ENST00000305097 | 31 |
| MSTRG_6960_4, MSTRG_3287_5, ENST00000694921, ENST00000450273 | 28 |
| MSTRG_7963_25, MSTRG_10613_1, MSTRG_10895_4, ENST00000238721 | 36 |
| MSTRG_7963_25, MSTRG_11929_9, MSTRG_575_23, MSTRG_1153_17 | 23 |
| MSTRG_7963_25, MSTRG_18204_6, MSTRG_28891_22, ENST00000305097 | 33 |
| MSTRG_7963_25, MSTRG_26337_1, ENST00000450273, ENST00000305097 | 23 |
| MSTRG_7963_25, ENST00000480825, MSTRG_3287_5, ENST00000694921 | 32 |
| MSTRG_7963_25, MSTRG_30661_17, MSTRG_30665_6, ENST00000357266 | 21 |
| MSTRG_10611_5, MSTRG_10613_1, MSTRG_10895_4, ENST00000238721 | 33 |
| MSTRG_10611_5, MSTRG_11929_9, ENST00000587709, ENST00000694921 | 35 |
| MSTRG_10611_5, MSTRG_18204_6, MSTRG_22220_1, ENST00000587709 | 26 |
| MSTRG_10611_5, MSTRG_1097_9, MSTRG_28891_22, MSTRG_30661_17 | 27 |
| MSTRG_10613_1, MSTRG_10895_4, ENST00000238721, MSTRG_28891_22 | 42 |
| MSTRG_10613_1, ENST00000587709, ENST00000480825, MSTRG_28891_22 | 36 |
| MSTRG_10613_1, ENST00000587709, MSTRG_28891_22, ENST00000305097 | 37 |
| MSTRG_10613_1, MSTRG_26337_1, MSTRG_3287_5, ENST00000694921 | 31 |
| MSTRG_10613_1, ENST00000694921, ENST00000489175, ENST00000296088 | 27 |
| MSTRG_10895_4, MSTRG_11929_9, ENST00000587709, ENST00000694921 | 44 |
| MSTRG_10895_4, MSTRG_18204_6, MSTRG_28891_22, MSTRG_30661_17 | 38 |
| MSTRG_10895_4, MSTRG_22220_1, ENST00000238721, MSTRG_28891_22 | 41 |
| MSTRG_10895_4, MSTRG_26337_1, ENST00000694921, ENST00000232014 | 32 |
| MSTRG_10895_4, MSTRG_26337_1, ENST00000489175, ENST00000232014 | 26 |
| MSTRG_10895_4, MSTRG_26337_1, MSTRG_28891_22, ENST00000305097 | 38 |
| MSTRG_10895_4, MSTRG_1097_9, MSTRG_1153_17, ENST00000238721 | 29 |
| MSTRG_10895_4, ENST00000480825, ENST00000238721, ENST00000305097 | 35 |
| MSTRG_11929_9, MSTRG_18204_6, ENST00000489175, ENST00000238721 | 30 |
| MSTRG_11929_9, MSTRG_22220_1, MSTRG_575_23, MSTRG_30661_17 | 25 |
| MSTRG_11929_9, ENST00000587709, MSTRG_3287_5, ENST00000694921 | 39 |
| MSTRG_11929_9, ENST00000587709, MSTRG_28891_22, MSTRG_42624_1 | 36 |
| MSTRG_11929_9, MSTRG_3287_5, ENST00000296088, MSTRG_42624_1 | 25 |
| MSTRG_11929_9, ENST00000694921, ENST00000489175, MSTRG_28891_22 | 39 |
| MSTRG_11929_9, ENST00000238721, MSTRG_42624_1, ENST00000357266 | 27 |
| MSTRG_18204_6, ENST00000489175, ENST00000232014, ENST00000357266 | 19 |
| MSTRG_22220_1, ENST00000587709, ENST00000480825, ENST00000450273 | 26 |
| MSTRG_22220_1, ENST00000008938, MSTRG_3287_5, ENST00000357266 | 21 |
| ENST00000587709, ENST00000008938, ENST00000480825, MSTRG_30665_6 | 21 |
| ENST00000587709, ENST00000480825, MSTRG_3287_5, MSTRG_28891_22 | 37 |
| MSTRG_575_23, MSTRG_1097_9, ENST00000450273, MSTRG_30665_6 | 14 |
| MSTRG_1097_9, MSTRG_28891_22, ENST00000296088, ENST00000305097 | 28 |
| MSTRG_1153_17, ENST00000694921, MSTRG_30661_17, ENST00000357266 | 25 |

1. **Performance of Model on excluded samples**


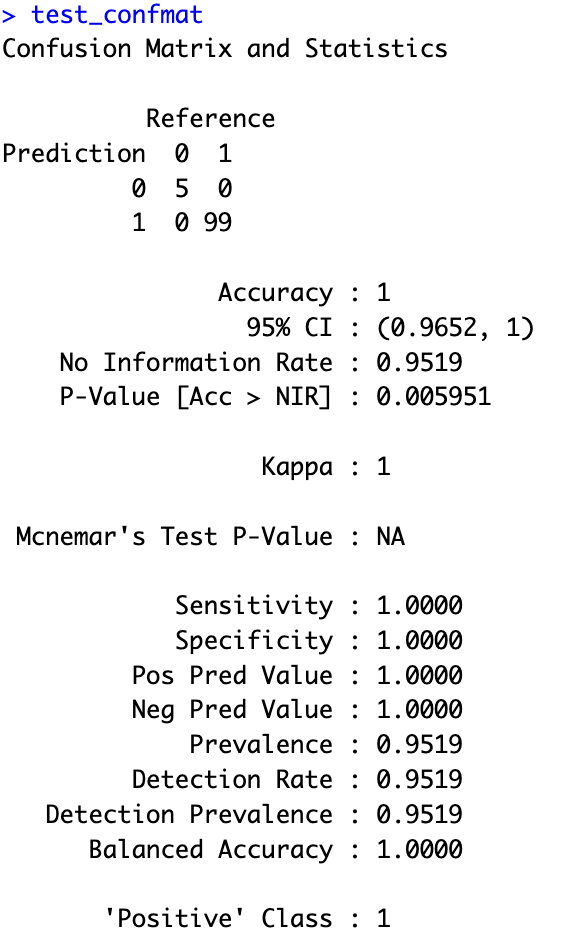

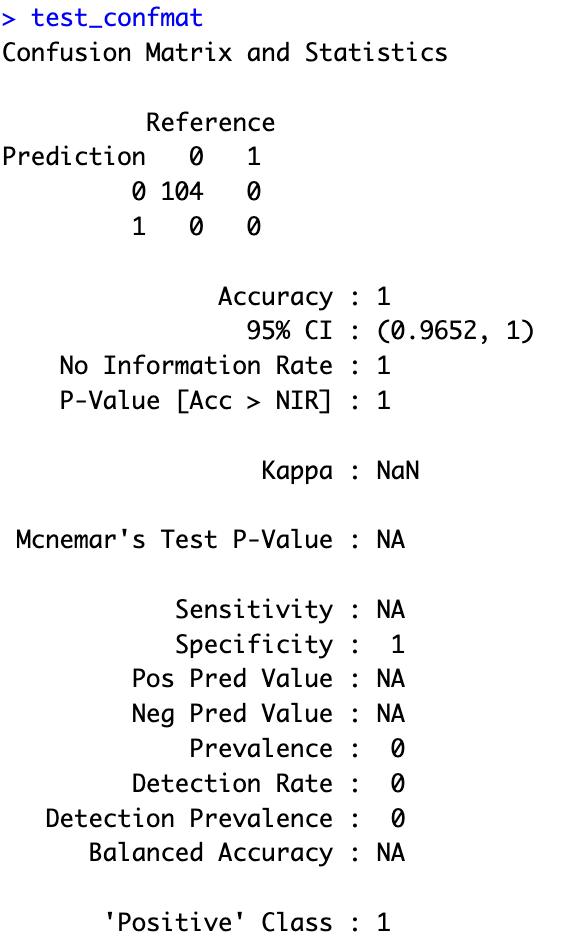
Hemorrhagic Stroke vs. Others Ischemic Stroke vs. Stroke Mimic
