# Supplementary material for: Blood RNA Signatures Enable Accurate Discrimination of Stroke Subtype and Onset Time at Hospital Admission
Source: Research Square preprint supplement (doi:10.21203/rs.3.rs-9022364/v1), 2026-03-08
Supplement: Supplementary file 2 [file d1263df376d7e56cb7295572.docx]

**Table 1. Participants in training and validation data to classify hemorrhage samples**

| **Characteristics** | **Train Data** | **Validation Data** |
| --- | --- | --- |
| **Total Samples** | 84 | 81 |
| Female sex, n (%) | 47 (56%) | 42 (52%) |
| Age, median (IQR), | 62 (55.5 - 75.5) | 59 (40 - 70) |
| **NIHSS score, median (IQR)** |  |  |
| Hemorrhagic Stroke | 7.5 (5.75 – 10.5) | 4.5 (3.25 – 8.75) |
| Ischemic Stroke | 7(4 - 10) | 5(2 – 9.5) |
| **Diagnosis, n (%)** |  |  |
| Hemorrhagic Stroke | 13 (15%) | 06 (7%) |
| Ischemic Stroke | 29 (35%) | 51 (63%) |
| Stroke Mimic | 42 (50%) | 24 (30%) |

**Table 2. ML Training and validation parameters and performance in recall testing**

| **Model** |  | **Train Data (N=84)** | | | | |
| --- | --- | --- | --- | --- | --- | --- |
|  | **AUC-ROC** | **Acc.** | **Sens.** | **Spec.** | **Balanced Acc.** | **F1** | |
| rf | 1 | 1 | 1 | 1 | 1 | 1 | |
| glmnet | 1 | 1 | 1 | 1 | 1 | 1 | |
| mars | 1 | 1 | 1 | 1 | 1 | 1 | |
| ranger | 1 | 1 | 1 | 1 | 1 | 1 | |
| pls | 1 | 1 | 1 | 1 | 1 | 1 | |
| rpart | 0.96 | 0.94 | 0.69 | 0.99 | 0.84 | 0.78 | |
| svm | 1 | 1 | 1 | 1 | 1 | 1 | |
| gbm | 1 | 0.99 | 1 | 0.93 | 0.99 | 0.96 | |
| nnet | 1 | 1 | 1 | 1 | 1 | 1 | |

| **Model** |  | **Validation Data (N=81)** | | | | |
| --- | --- | --- | --- | --- | --- | --- |
|  | **AUC-ROC** | **Acc.** | **Sens.** | **Spec.** | **Balanced Acc.** | **F1** |
| rf | 0.91 | 0.93 | 0.00 | 1.00 | 0.50 | NA |
| glmnet | 0.69 | 0.72 | 0.33 | 0.75 | 0.54 | 0.15 |
| mars | 0.52 | 0.57 | 0.33 | 0.59 | 0.46 | 0.10 |
| ranger | 0.76 | 0.93 | 0.00 | 1.00 | 0.50 | NA |
| pls | 0.59 | 0.75 | 0.17 | 0.80 | 0.48 | 0.48 |
| rpart | 0.77 | 0.80 | 0.67 | 0.81 | 0.74 | 0.33 |
| svm | 0.80 | 0.93 | 0.00 | 1.00 | 0.50 | NA |
| gbm | 0.76 | 0.93 | 0.33 | 0.97 | 0.65 | 0.40 |
| nnet | 0.49 | 0.60 | 0.17 | 0.64 | 0.40 | 0.06 |

**Table 3. Biomarker panels selected for each classification task**

| **Task*** | **Panel** |
| --- | --- |
| 1.1 | ENST00000587014, MSTRG_24342_56, MSTRG_42624_2 |
|  | ENST00000587014, MSTRG_32734_241, ENST00000465590, MSTRG_50567_5 |
| 1.2 | MSTRG_7936_41, MSTRG_10294_21, ENST00000397762, ENST00000418132 |
| 2 | ENST00000531913, MSTRG_11018_26, MSTRG_19969_3, MSTRG_54881_4 |
| 3 | MSTRG_10895_4, MSTRG_11929_9, ENST00000587709, ENST00000694921 |

*Task: 1. Diagnosis of stroke types; 1.1: Hemorrhagic stroke vs. others, 1.2: Ischemic Stroke vs. Stroke Mimic. 2. Prediction of actionable tPA time window. 3. Prediction of post-stroke outcome
